# Supplementary material for: Normalization of RNA-Sequencing Data from Samples with Varying mRNA Levels
Source: PubMed Central journal article supplement (PMC3934880; doi:10.1371/journal.pone.0089158), 2014-02-25

Supplemental Table 1. List of primers. Forward and reverse primers used for qPCR.

| RefSeq       | Name              | forward                  | reverse                   |
|--------------|-------------------|--------------------------|---------------------------|
| NM_181601    | <i>bactin2</i>    | TGCGGAATATCATCTGCTTGTAAC | GAGCATCATCTCCAGCGAATC     |
| NM_001001844 | <i>ctcf</i>       | CATTGCCTGAGGGCTTTCAG     | CGTCTGTGTCGCACCAGCTC      |
| NM_212705    | <i>tex10</i>      | ACCACACACAGGCATCTGGAC    | GTAGGGTTAGCAGACAGCAACTCC  |
| NM_001007449 | <i>stx17</i>      | CACATCAACTCCAGCCGCAC     | CAACTACTCGAACTCGTCCACAC   |
| NM_199976    | <i>sod2</i>       | GGACAAATCTGTCACCCAATGG   | CAGCCTGAGCCCTGAACAGC      |
| NM_200696    | <i>lsm4</i>       | AGAGGAGGTGGACCTGGAAGAG   | GCTTTTTGTCTTGTTGCTGTCC    |
| NM_213479    | <i>cnot8</i>      | TCAAGTGGCTCTCCTTTCACAG   | CGTGTCTTCTCTGGCAGC        |
| NM_001076755 | <i>zgc:153206</i> | CTTGTTCTTGGTGGCACAGC     | TGGACGATGTAACGGCACATG     |
| NM_199430    | <i>ccnb2</i>      | CATCATGGAAATGCACGCTC     | CTGCACCGCTTACTGGTCCAC     |
| NM_001017544 | <i>abcb8</i>      | CTGTCCTGTGGGAGTTTGTTTCG  | CCAGATCCCCAACATTAGAGG     |
| NM_001111239 | <i>fam53c</i>     | CTGCTGATGGATTGATGCCTG    | GGGAAGCTGGAGCTGAGCAC      |
| NM_198817    | <i>stm</i>        | CCTAGCAACGAGGACTCAAGAAC  | GGACGTGAAACTCTGGTTATCTTG  |
| NM_131177    | <i>jup</i>        | CCTACACCACCACATTCACAGAG  | CATCACAGTCTCAGGAAACATGG   |
| NM_200852    | <i>rps9</i>       | CCTAGCAGCAATGTTAGCCTGAG  | GTACGTCTTACTGCAAACCCAAG   |
| NM_173232    | <i>rps5</i>       | AGCTCATCAACGCTGCCAAG     | ACAAAATGGAGATTAGCGGTTAGAC |
| NM_198364    | <i>tardbpl</i>    | GGGGCAATCTGGTGTACGTG     | CAAATCTGATGTCTTCTGGATGC   |
| NM_206888    | <i>melk</i>       | CAAGGTTATGCCATCGAGAC     | TATGCAGGACTGCCACAACATG    |
| NM_001103138 | <i>ercc1</i>      | GATTCAGCGTTCTCAAAGGACAG  | AACAAACTCTGCATAGGACAGTGG  |

Fig. S1

(a)

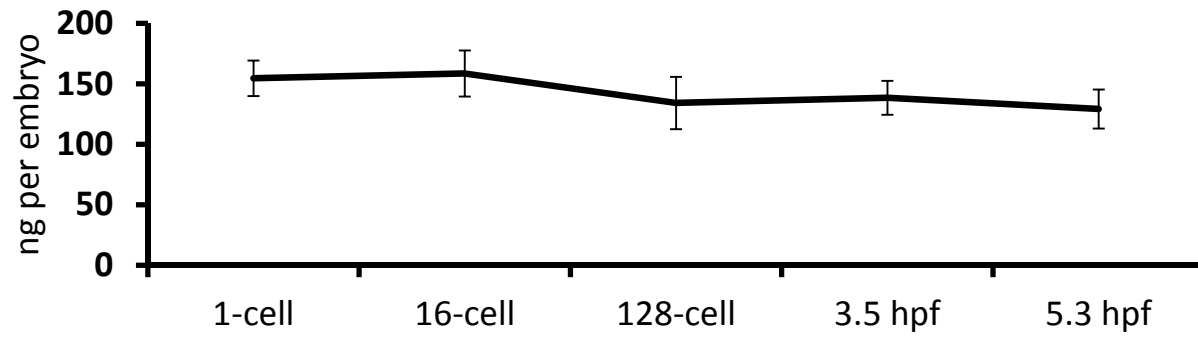

(b)

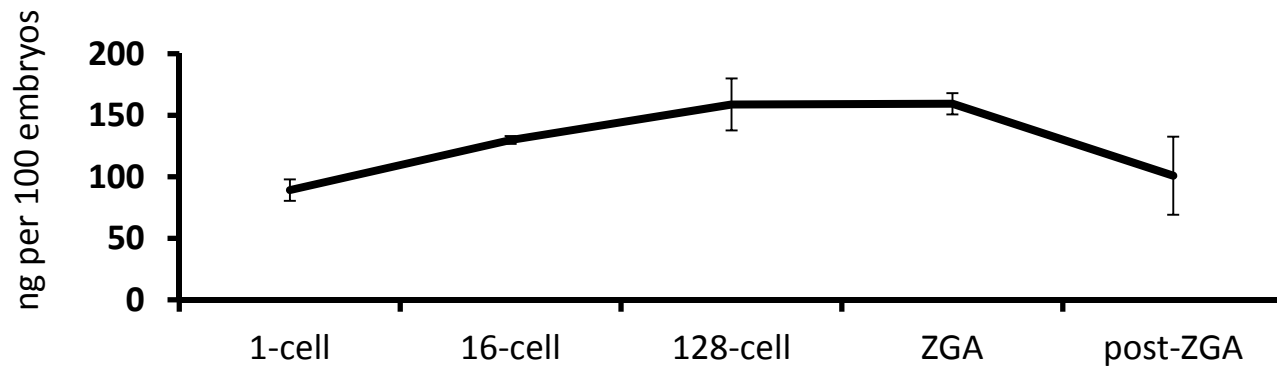

Fig. S2

(a)

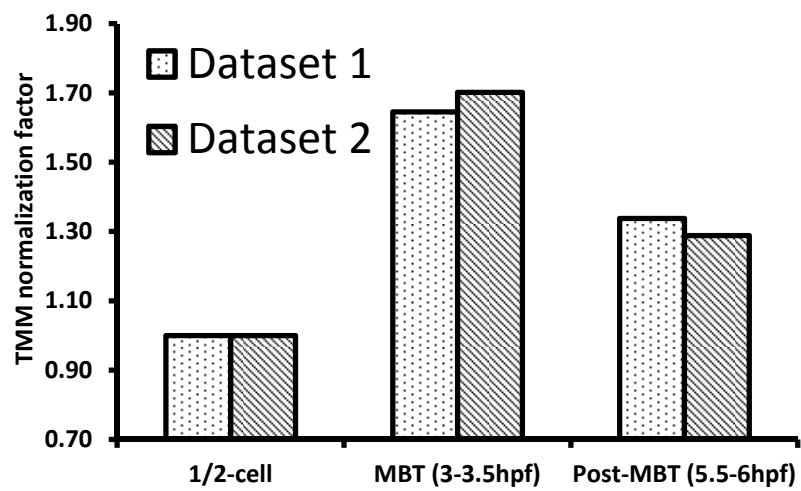

(b)

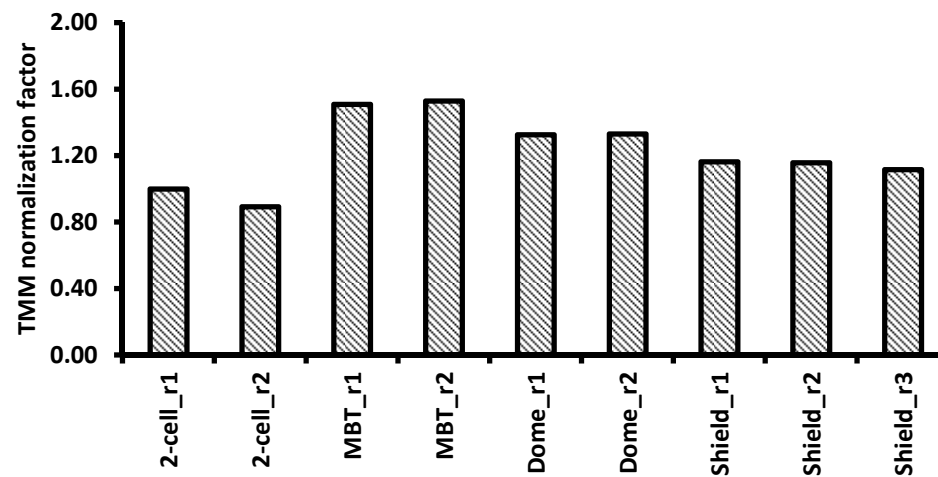

(c)

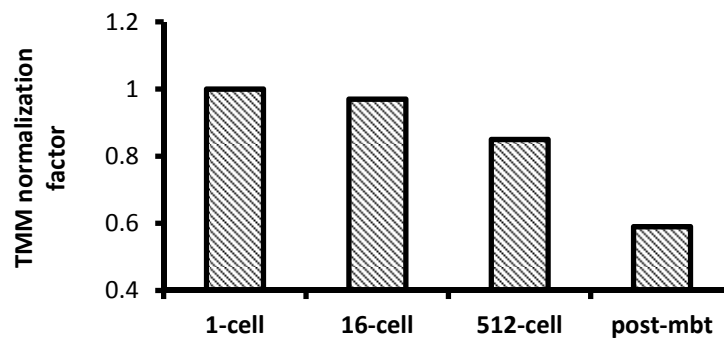

Fig. S3

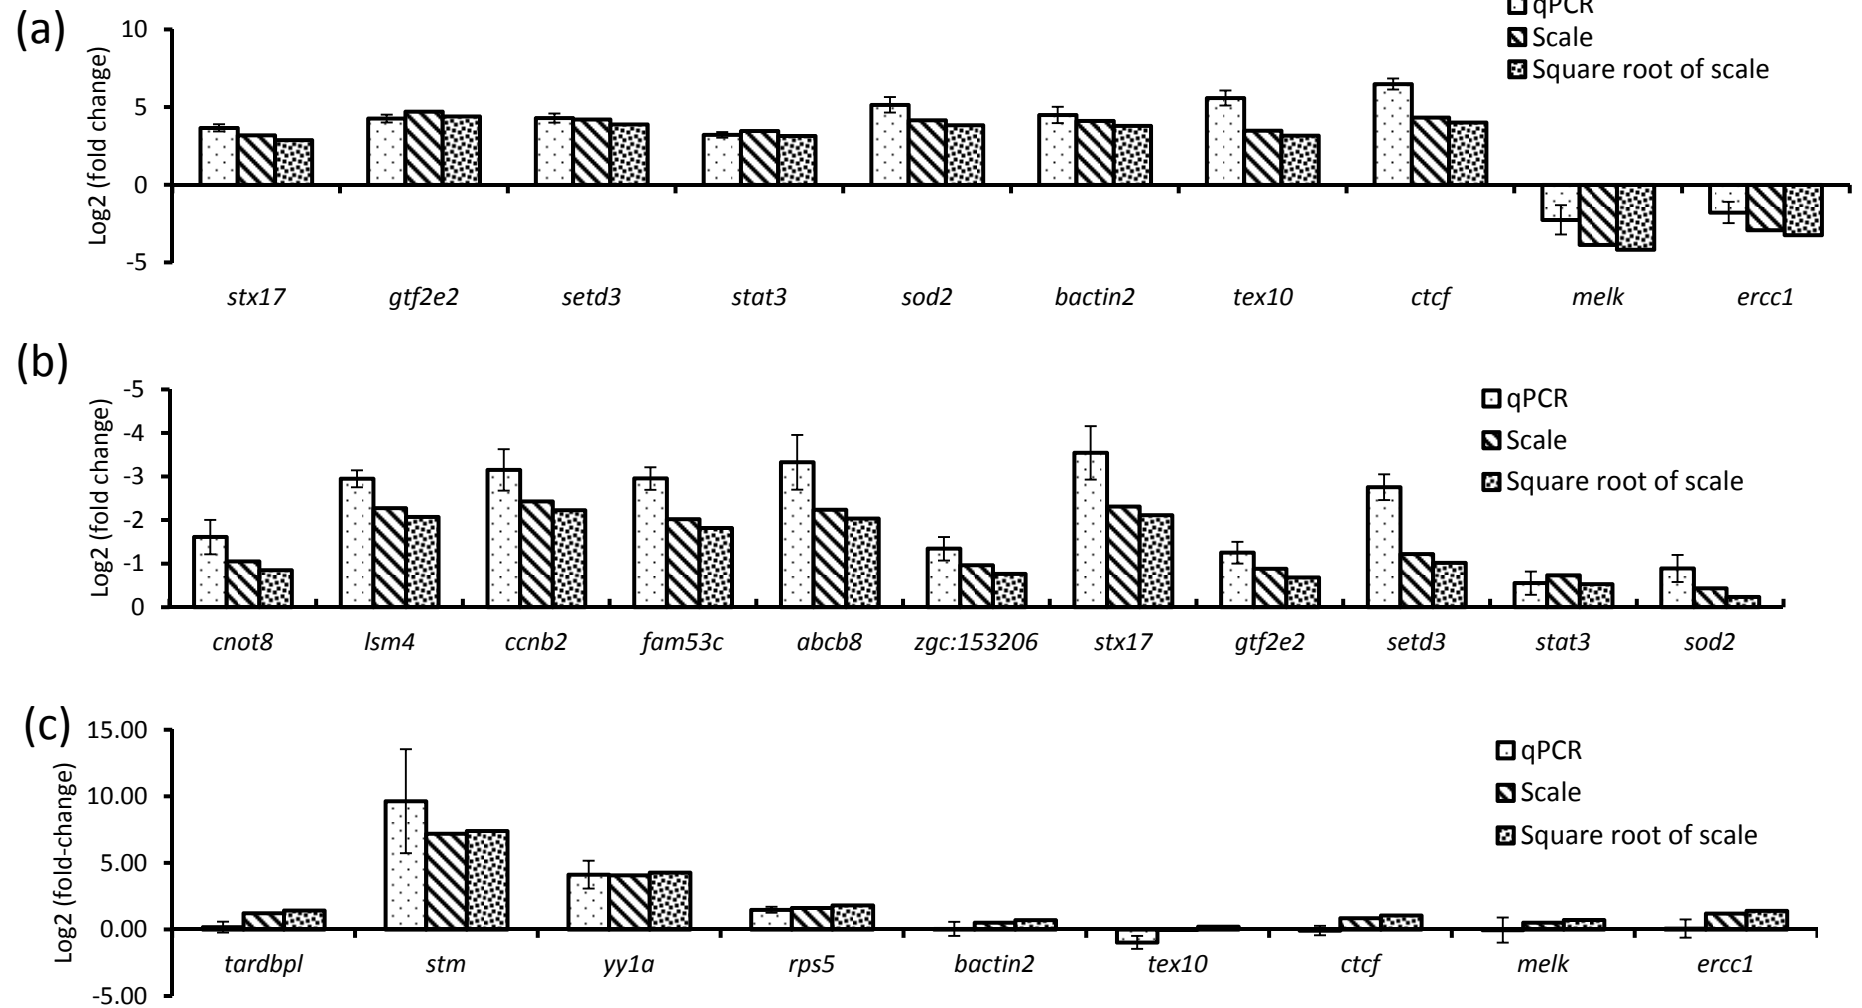

Fig. S4

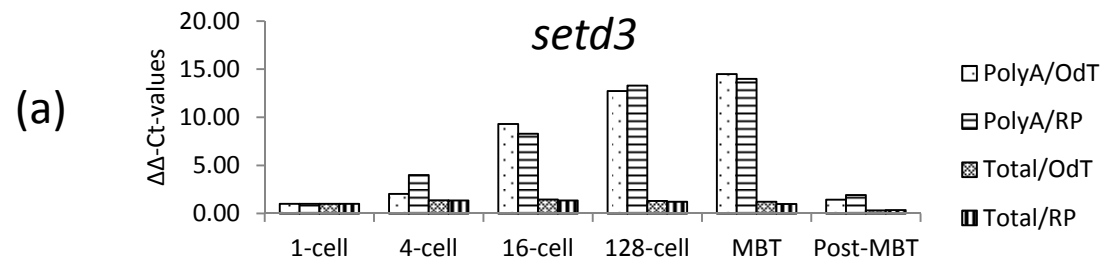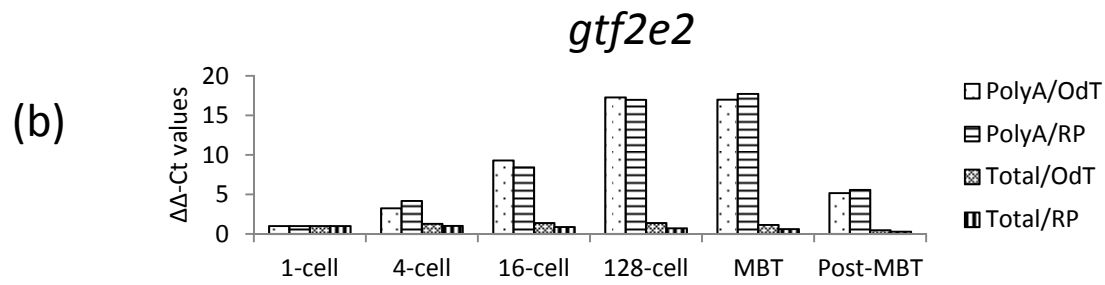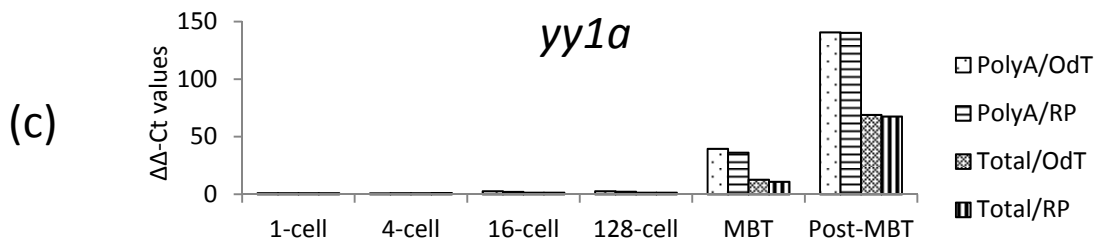

Fig. S5

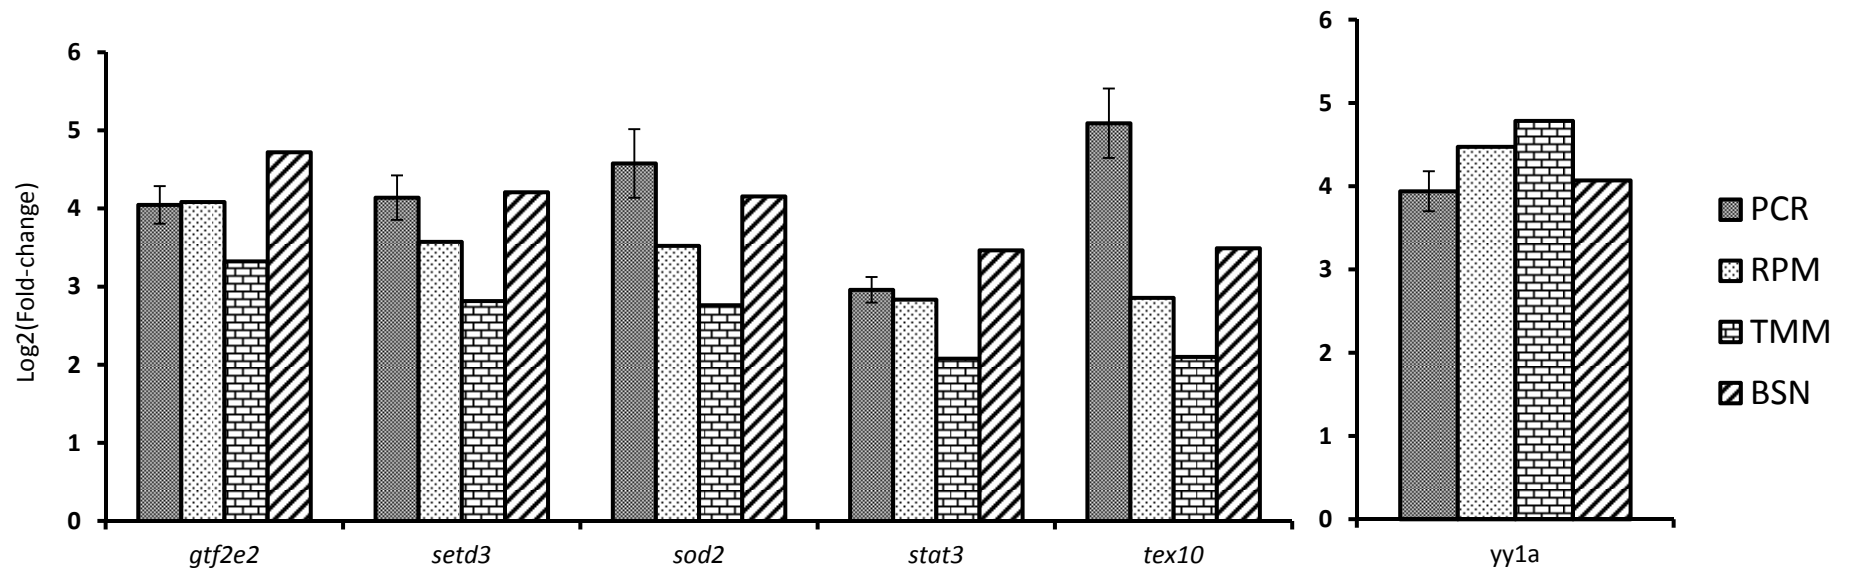

Fig.S6

(a)

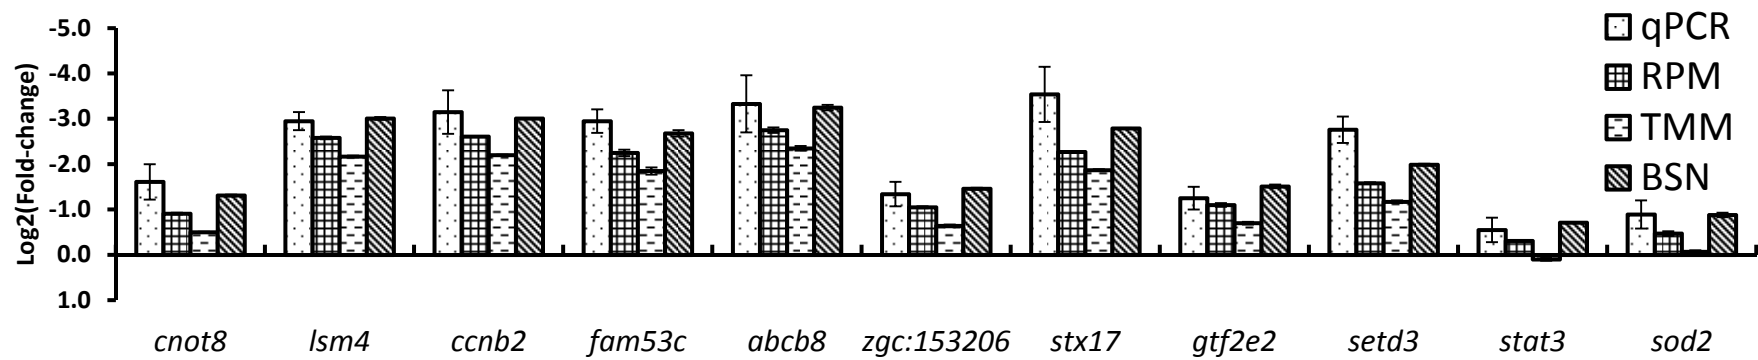

(b)

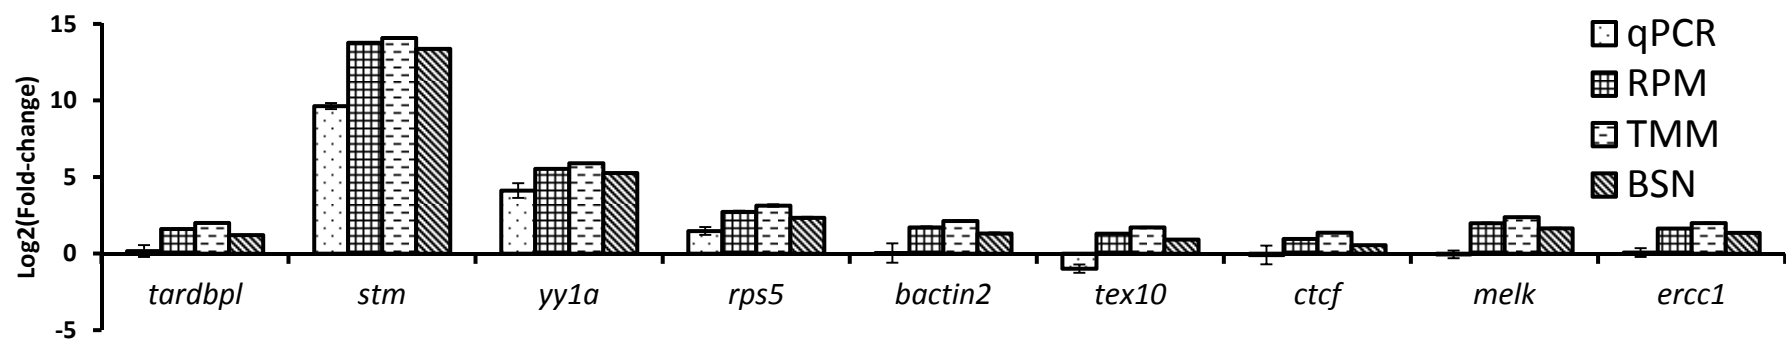

Supplement: pone.0089158.s001.pdf [file pone.0089158.s001.pdf]
